# Supplementary material for: Assembling mono-, di- and tri-nuclear coordination complexes with a ditopic analogue of 2,2′:6′,2′′-terpyridine: syntheses, structures and catalytic studies
Source: Royal Society of Chemistry journal article supplement (doi:10.1039/c5ra06197k), 2015-01-01

*Electronic Supporting Information:*

**Assembling mono-, di- and tri-nuclear coordination complexes with a ditopic analogue of 2,2':6',2''-terpyridine: syntheses, structures and catalytic studies**

Zhiwei Yin,<sup>a,b</sup> Guoqi Zhang,<sup>a\*</sup> Tonya Phoenix,<sup>a</sup> Shengping Zheng<sup>b</sup> and James C. Fetting<sup>c</sup>

**Fig. S1. Powder X-ray diffraction profiles (measured and simulated).**

Complex 1: Experimental PXRD profile

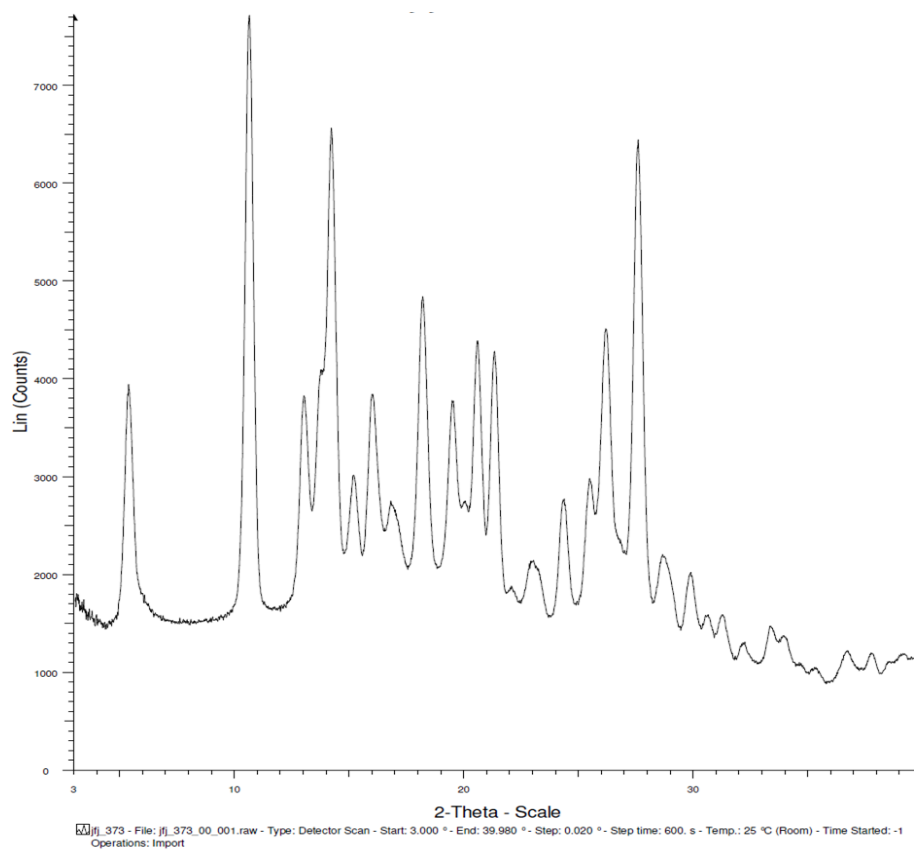

Complex 1: Calculated PXRD profile based on single crystal X-ray diffraction data

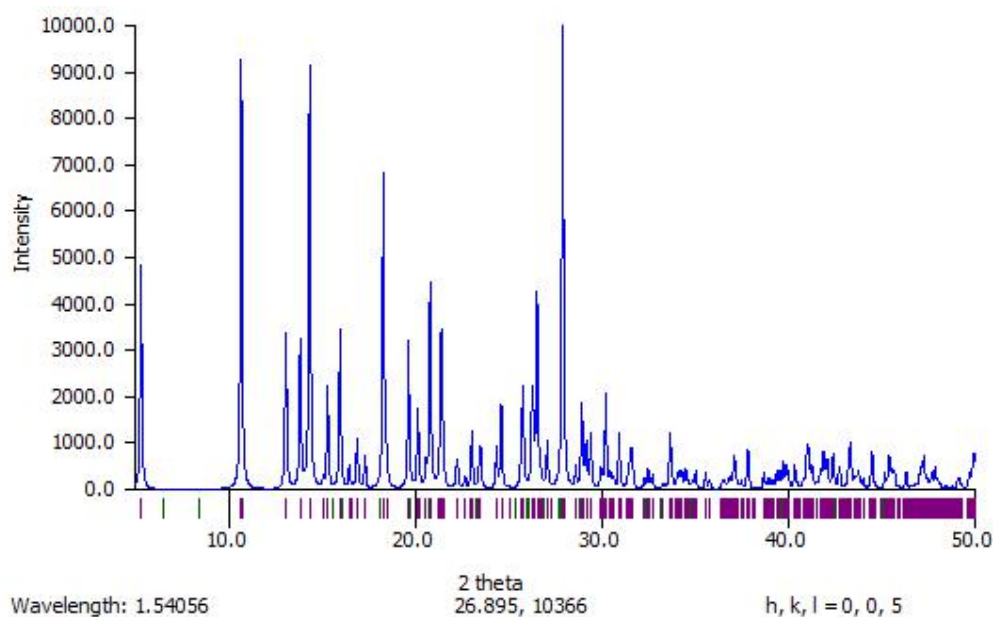

Complex 1: combined experimental and calculated spectra

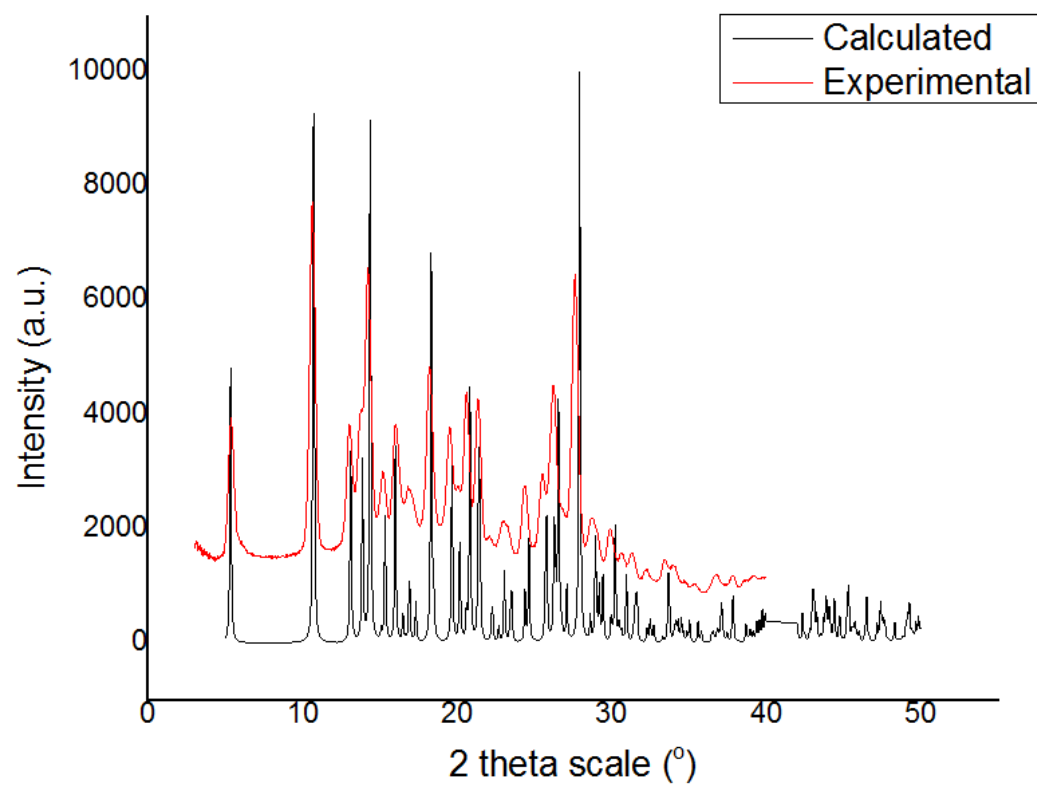

#### Complex 4: Experimental PXRD profile

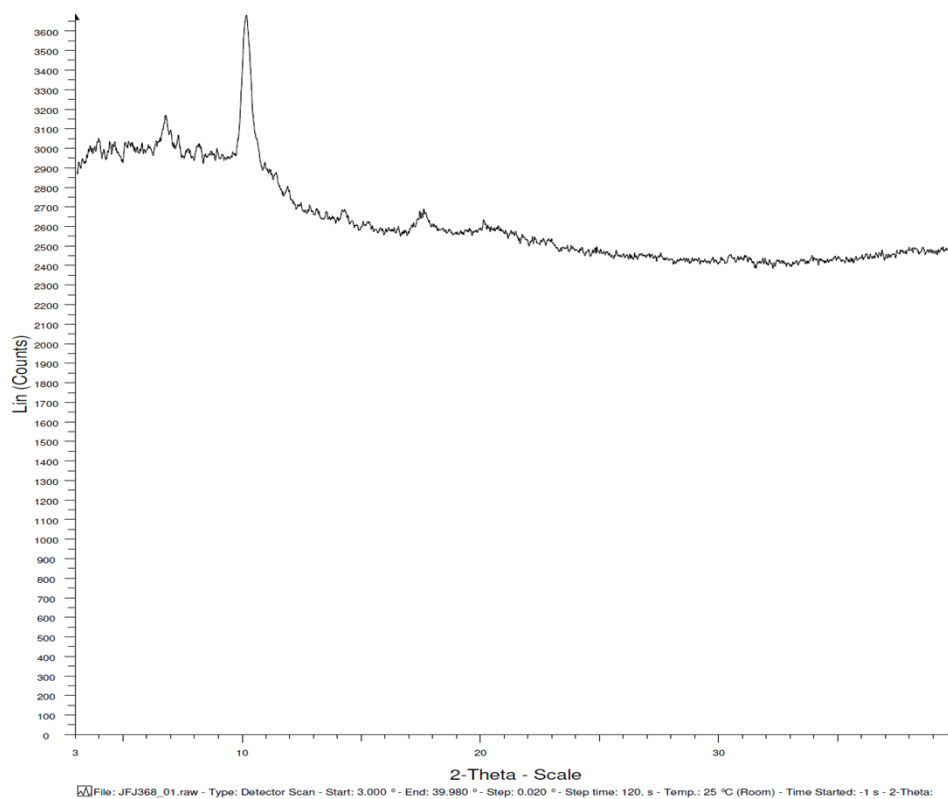

#### Complex 6: Experimental PXRD profile

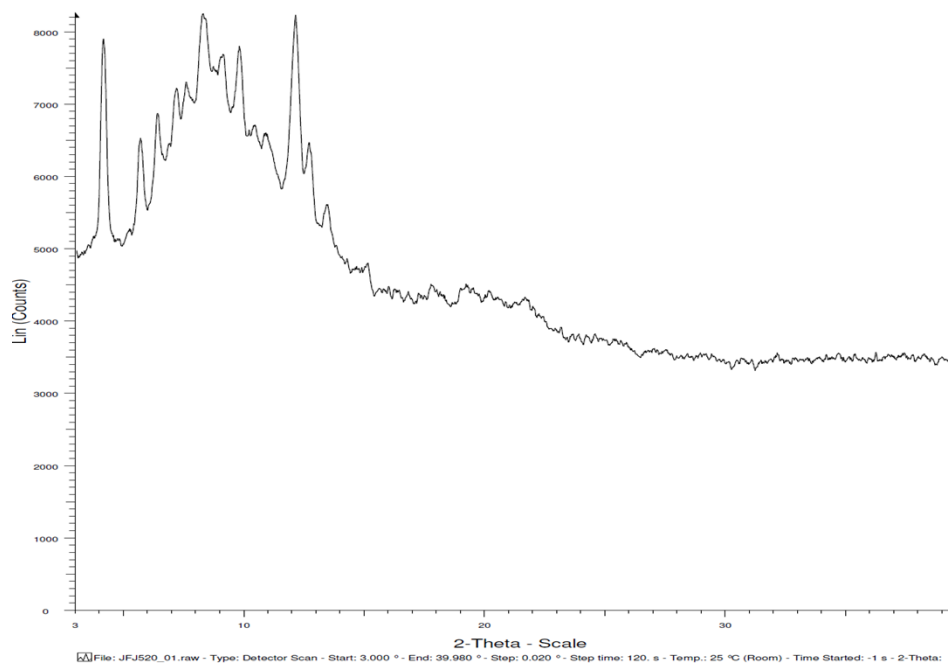

**Fig. S2. Thermogravimetric analysis (TGA) data for complexes 1-4 and 6.**

TGA for **1**:

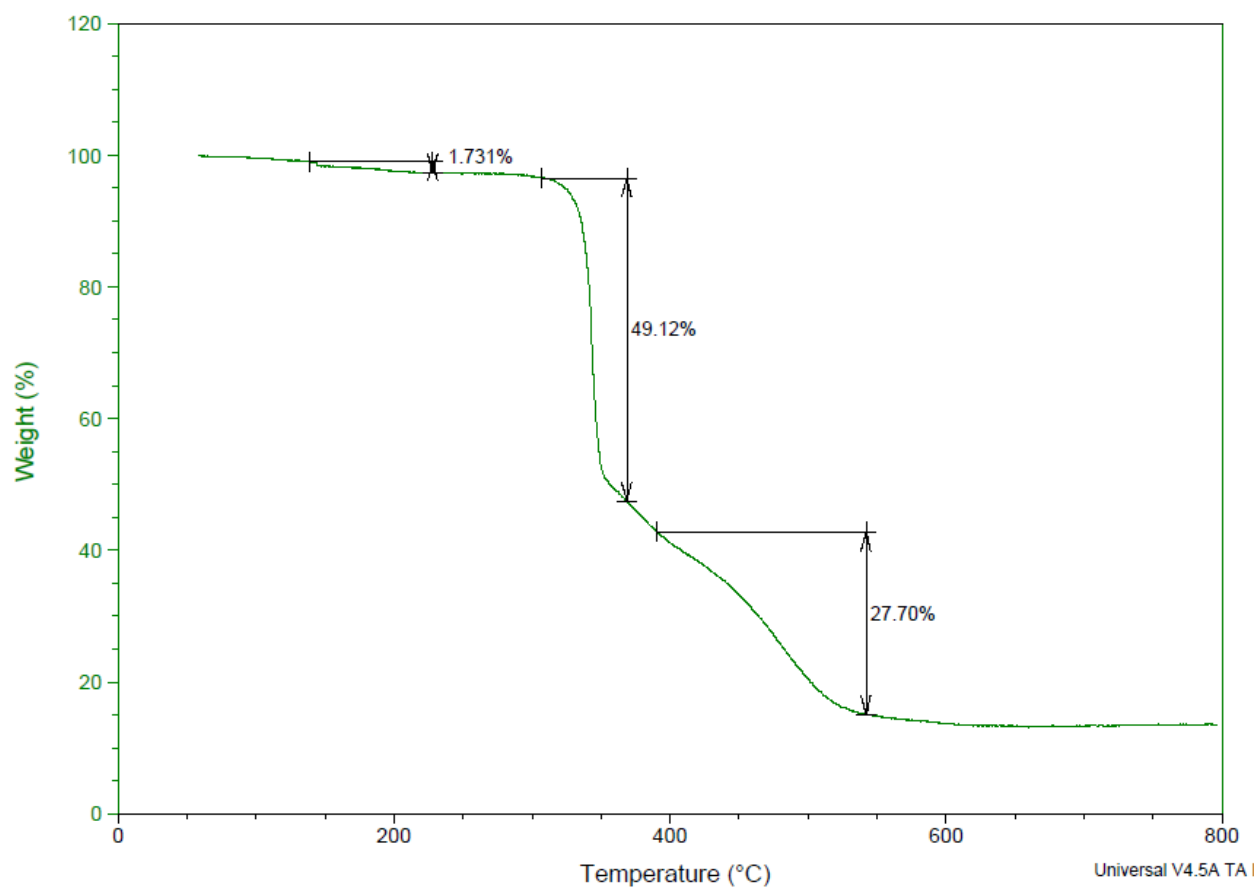

TGA for **2**:

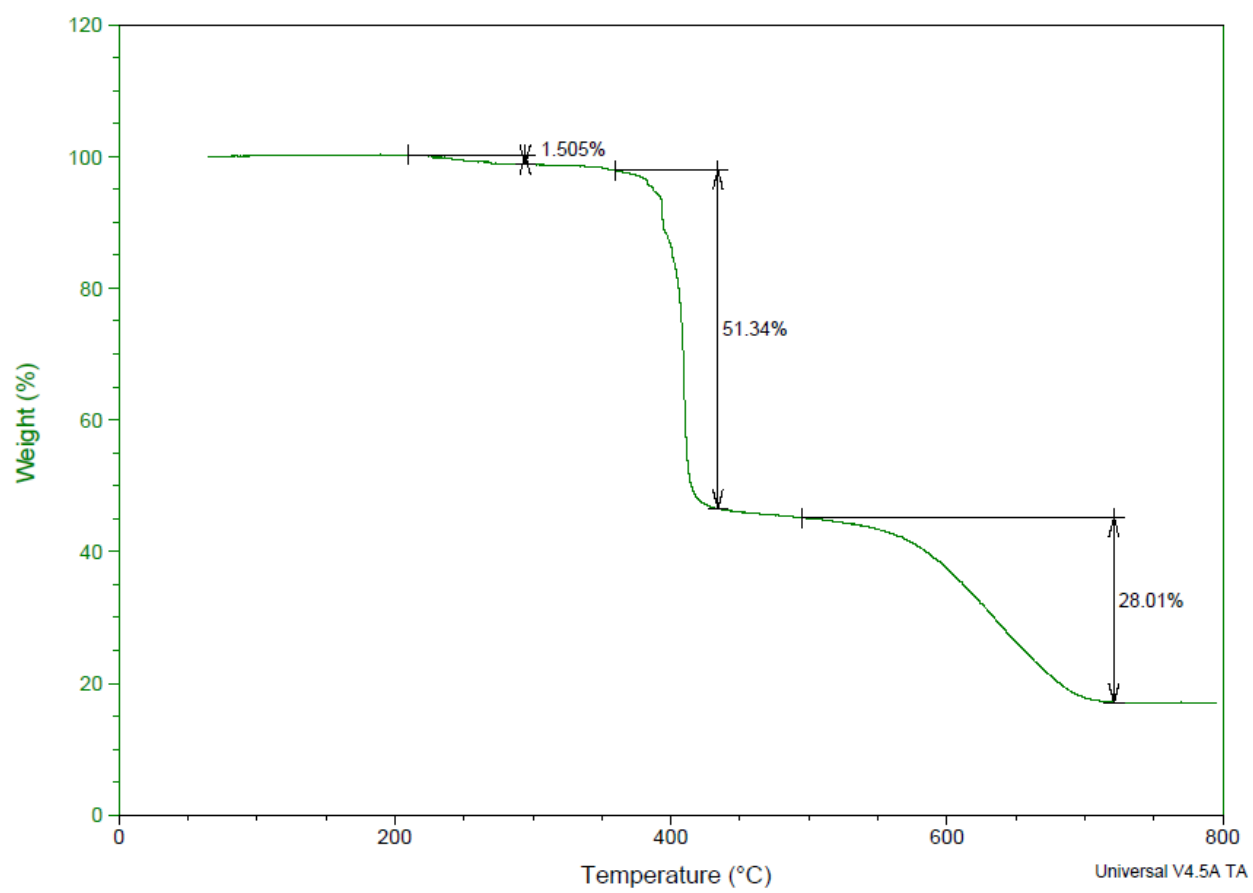

TGA for **3**:

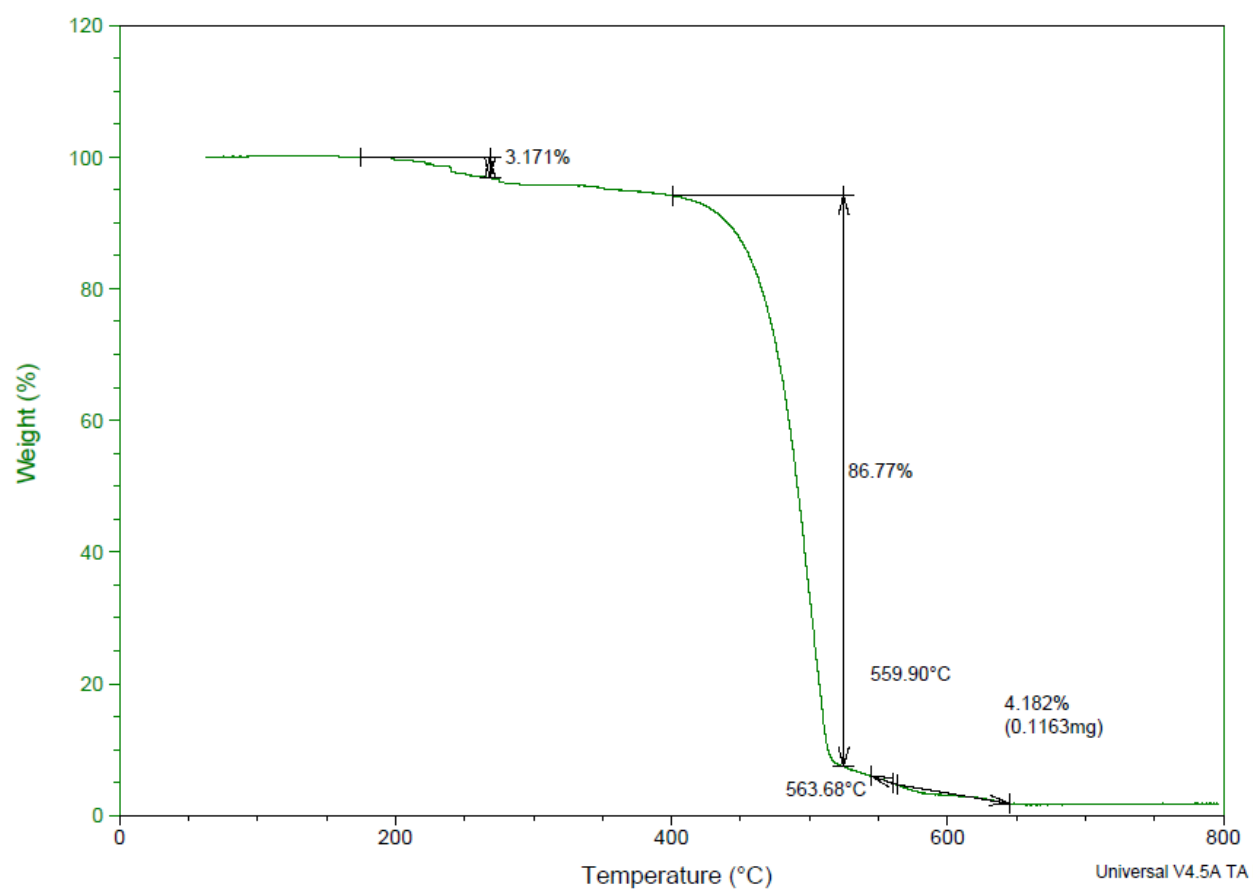

TGA for 4:

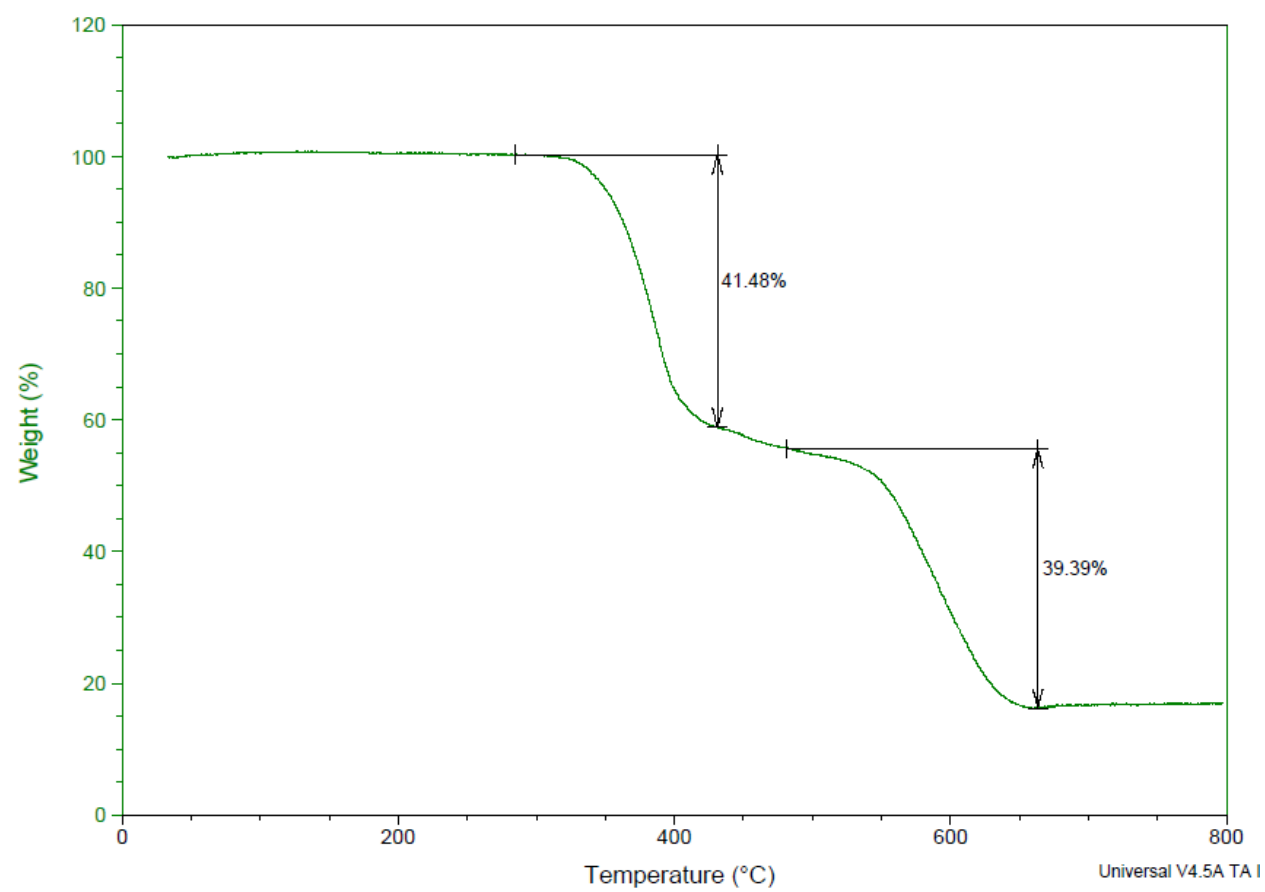



TGA for **6**:

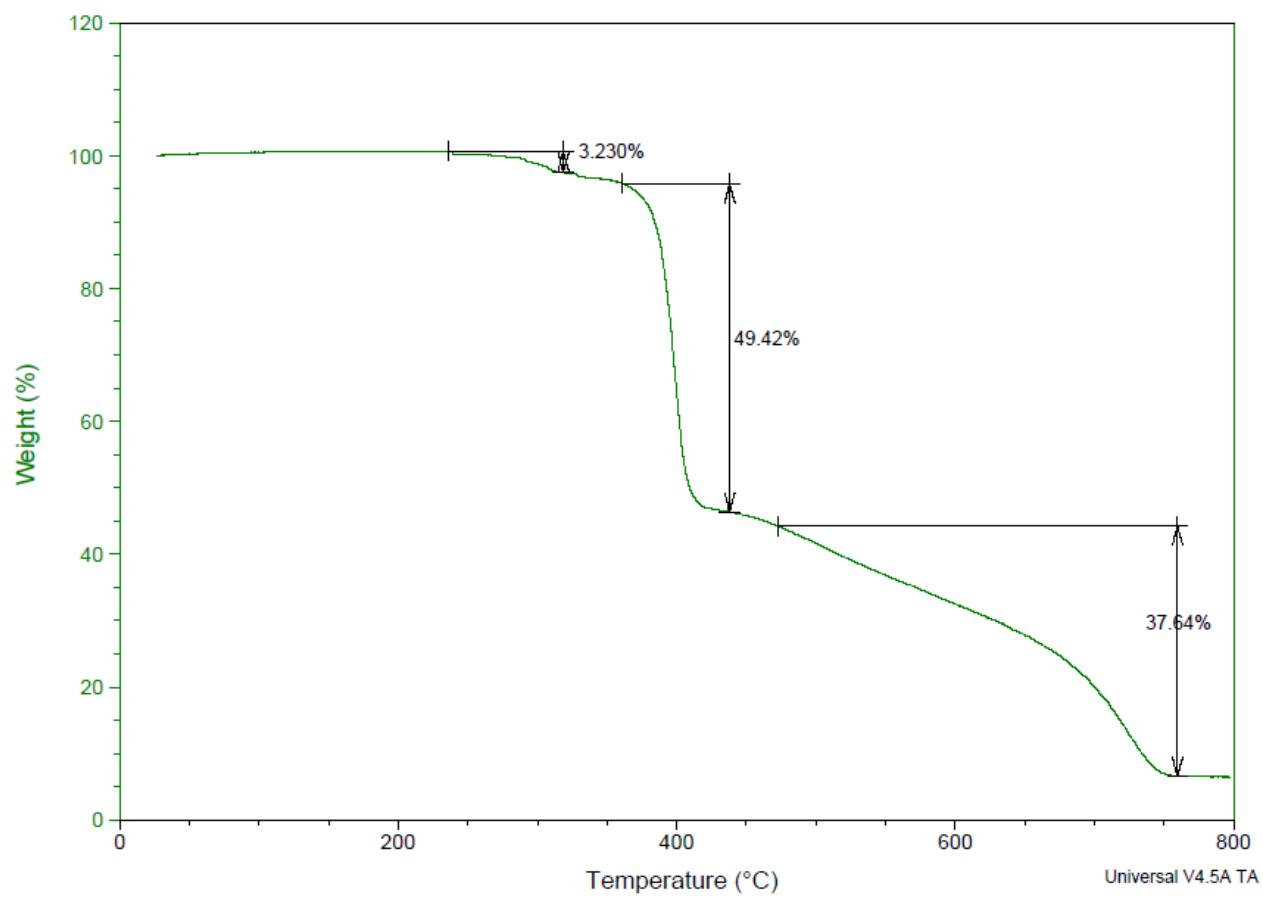

Supplement: c5ra06197k1.pdf [file c5ra06197k1.pdf]
